# Supplementary material for: Modulation of electronic bandgaps and subsequent implications on SQ efficiencies via strain engineering in ultrathin SnX (X = S, Se) nanowires
Source: Royal Society of Chemistry journal article supplement (doi:10.1039/d2tc03400j), 2022-01-01
Supplement: d2tc03400j1.pdf [file d2tc03400j1.pdf]

# Modulation of Electronic Bandgaps and Subsequent Implications on SQ Efficiencies via Strain Engineering in Ultrathin SnX (X = S, Se) Nanowires

Rishit S. Shukla<sup>a</sup>, Vidit B. Zala<sup>a</sup>, Sanjeev K. Gupta<sup>b,\*</sup>, P. N. Gajjar<sup>a,\*</sup>

<sup>a</sup>Department of Physics, University School of Sciences, Gujarat University, Ahmedabad 380 009, India

<sup>b</sup>Computational Materials and Nanoscience Group, Department of Physics, St. Xavier's College, Ahmedabad 380009, India

\*Corresponding author: [pngajjar@gujaratuniversity.ac.in](mailto:pngajjar@gujaratuniversity.ac.in) (Prof. P.N. Gajjar) and [Sanjeev.gupta@sxca.edu.in](mailto:Sanjeev.gupta@sxca.edu.in) (Dr. Sanjeev K. Gupta)

**Table S1.** Effect of strain on the structural parameters of SnS (SnSe) NW

| Applied Strain $\epsilon$ (%) | Lattice parameter $c$ (Å) | $d_1$ (Å)                    | $d_2$ (Å)                    | X-Sn-X $\theta_1$ (°)        | Sn-X-Sn $\theta_2$ (°)         | Phonon frequencies (cm <sup>-1</sup> ) |               |
|-------------------------------|---------------------------|------------------------------|------------------------------|------------------------------|--------------------------------|----------------------------------------|---------------|
| Compressive                   | -10                       | 6.79<br>(7.03)               | 2.60<br>(2.72)               | 2.67<br>(2.82)               | 82.91<br>(81.51)               | 88.79<br>(86.91)                       | +ve<br>(-200) |
|                               | -8                        | 6.94<br>(7.18)               | 2.60<br>(2.73)               | 2.68<br>(2.82)               | 84.80<br>(83.37)               | 89.11<br>(87.13)                       | -20<br>(-80)  |
|                               | -6                        | 7.09<br>(7.34)               | 2.61<br>(2.74)               | 2.68<br>(2.82)               | 88.67<br>(85.19)               | 89.43<br>(87.23)                       | +ve<br>(+ve)  |
|                               | -4                        | 7.24<br>(7.49)               | 2.62<br>(2.75)               | 2.68<br>(2.82)               | 88.53<br>(86.97)               | 89.58<br>(87.51)                       | +ve<br>(+ve)  |
|                               | -2                        | 7.39<br>(7.65)               | 2.63<br>(2.76)               | 2.68<br>(2.82)               | 90.36<br>(88.78)               | 89.78<br>(87.64)                       | +ve<br>(+ve)  |
| Unstrained                    | 0                         | <b>7.54</b><br><b>(7.81)</b> | <b>2.65</b><br><b>(2.78)</b> | <b>2.67</b><br><b>(2.81)</b> | <b>92.18</b><br><b>(90.53)</b> | <b>90.08</b><br><b>(87.86)</b>         | +ve<br>(+ve)  |
| Tensile                       | 2                         | 7.69<br>(7.96)               | 2.66<br>(2.79)               | 2.67<br>(2.81)               | 94.01<br>(92.31)               | 90.34<br>(88.03)                       | +ve<br>(+ve)  |
|                               | 4                         | 7.84<br>(8.12)               | 2.67<br>(2.80)               | 2.66<br>(2.80)               | 25.84<br>(94.06)               | 90.60<br>(88.18)                       | -20<br>(-20)  |
|                               | 6                         | 7.99<br>(8.28)               | 2.68<br>(2.81)               | 2.65<br>(2.79)               | 97.73<br>(95.86)               | 90.71<br>(88.44)                       | -20<br>(-20)  |
|                               | 8                         | 8.15<br>(8.43)               | 2.69<br>(2.82)               | 2.64<br>(2.78)               | 99.64<br>(97.73)               | 91.05<br>(88.50)                       | -40<br>(-30)  |
|                               | 10                        | 8.30<br>(8.59)               | 2.70<br>(2.83)               | 2.64<br>(2.78)               | 101.63<br>(99.62)              | 91.32<br>(88.64)                       | -50<br>(-40)  |

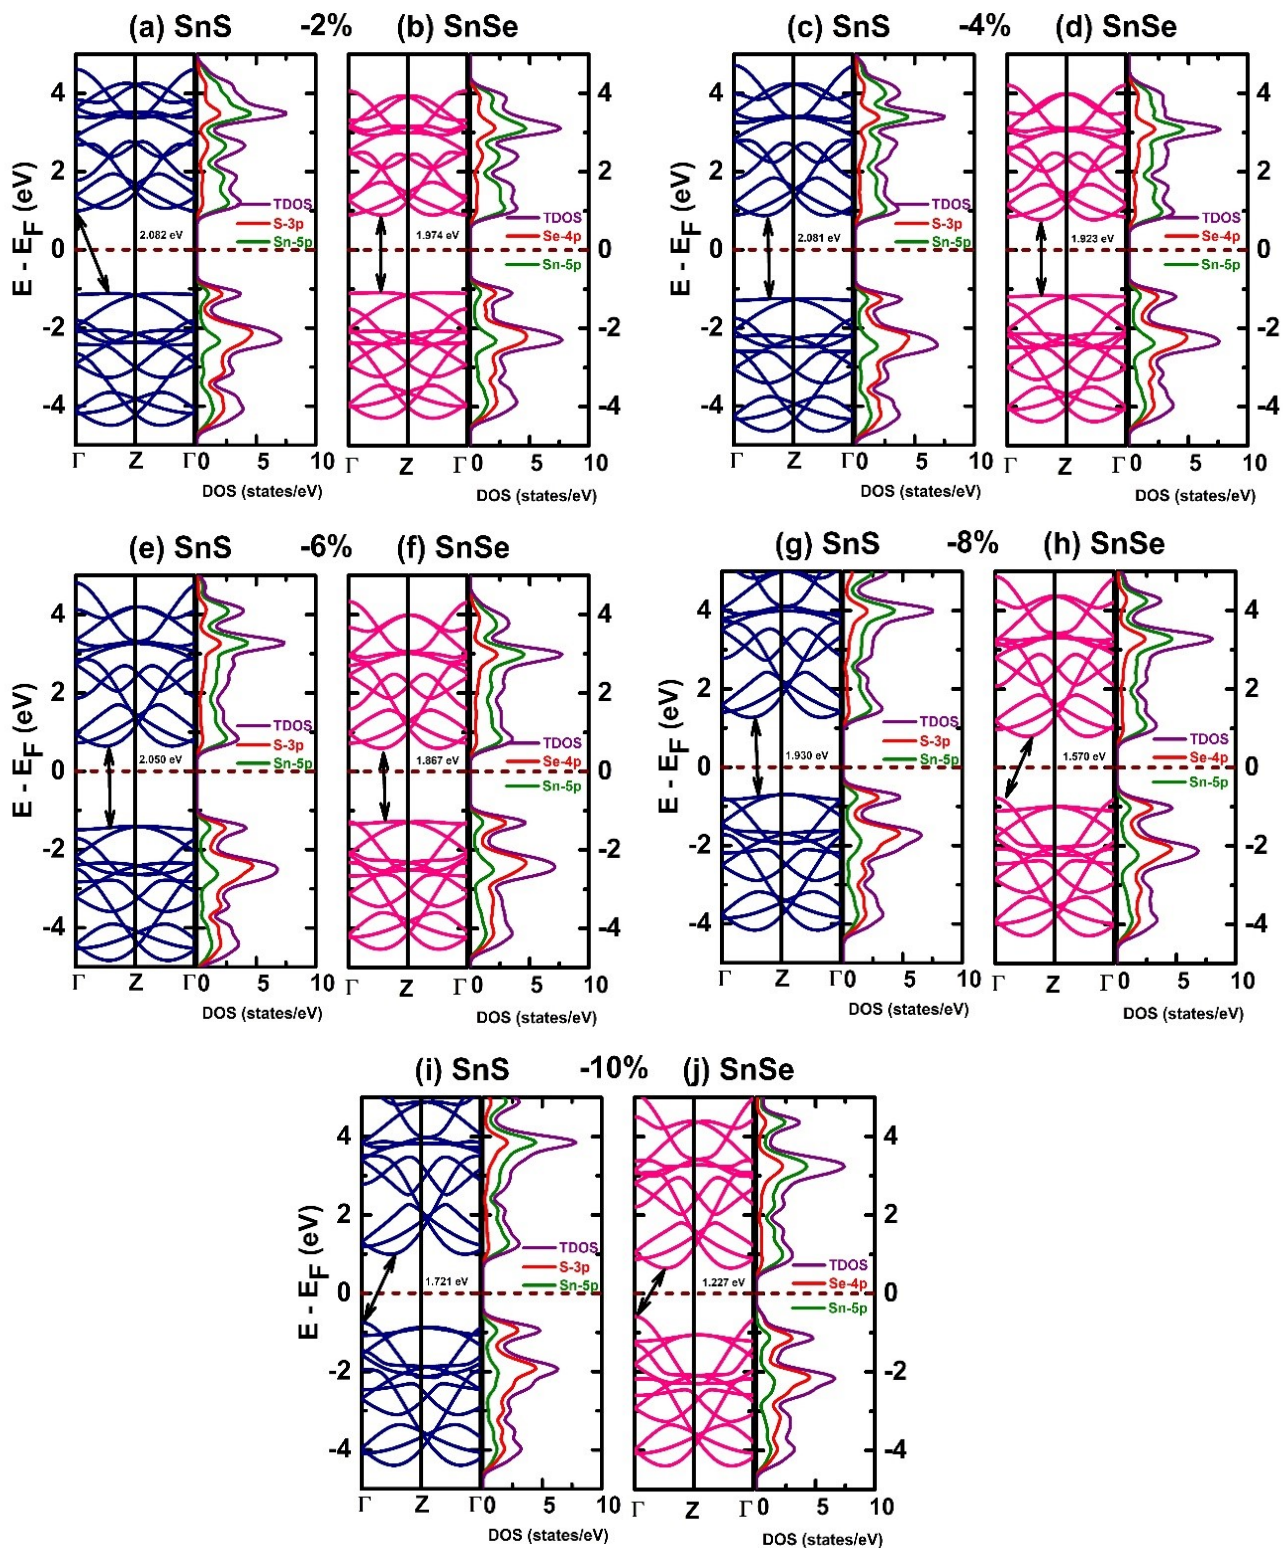

**Figure S1.** Electronic band structures, partial density of states (PDOS) and total density of states (TDOS) of ultrathin SnX (X = S, Se) NWs under varying compressive strains.
